# Supplementary material
Source: PubMed Central journal article supplement (PMC1334648)
Supplement: pnas_0507321103_1.pdf [file pnas_0507321103_1.pdf]

|        | CSF1R | PDGFRA | PDGFRB | KIT |
|--------|-------|--------|--------|-----|
| CSF1R  | X     | 4      | 20     | 1   |
| PDGFRA |       | X      | 3      | 17  |
| PDGFRB |       |        | X      | 4   |
| KIT    |       |        |        | X   |
