# Supplementary material
Source: PubMed Central journal article supplement (PMC1334648)

## 5q33-35: CSF1R and PDGFRB

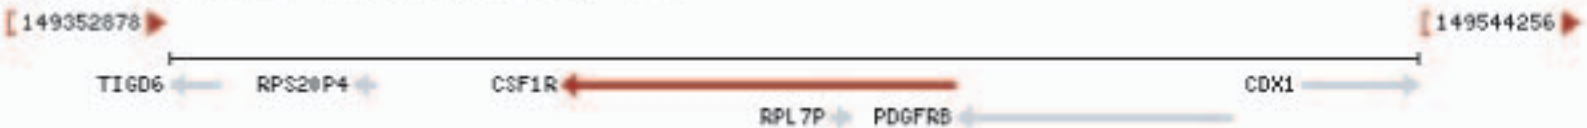

## 4q11-13: KIT and PDGFRA

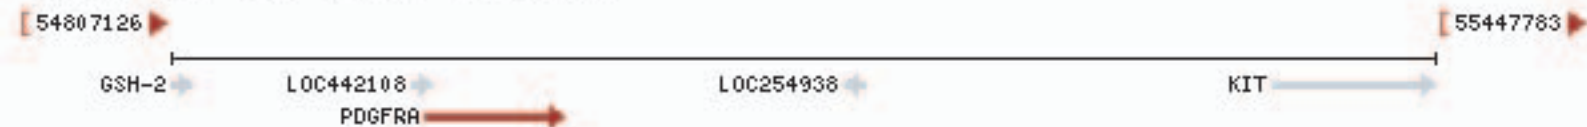

Supplement: pnas_0507321103_2.pdf [file pnas_0507321103_2.pdf]

## Chr 1p13 (CSF1 locus)

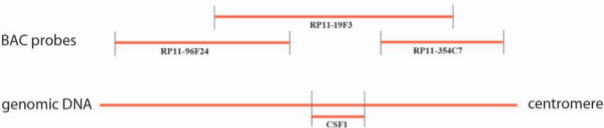

## Chr 2q37 (COL6A3 locus)

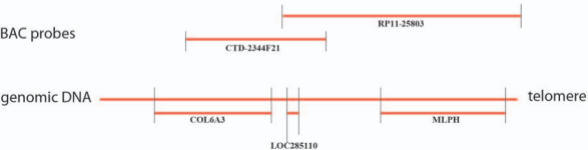

Supplement: pnas_0507321103_3.pdf [file pnas_0507321103_3.pdf]

Percentage  
cells positive

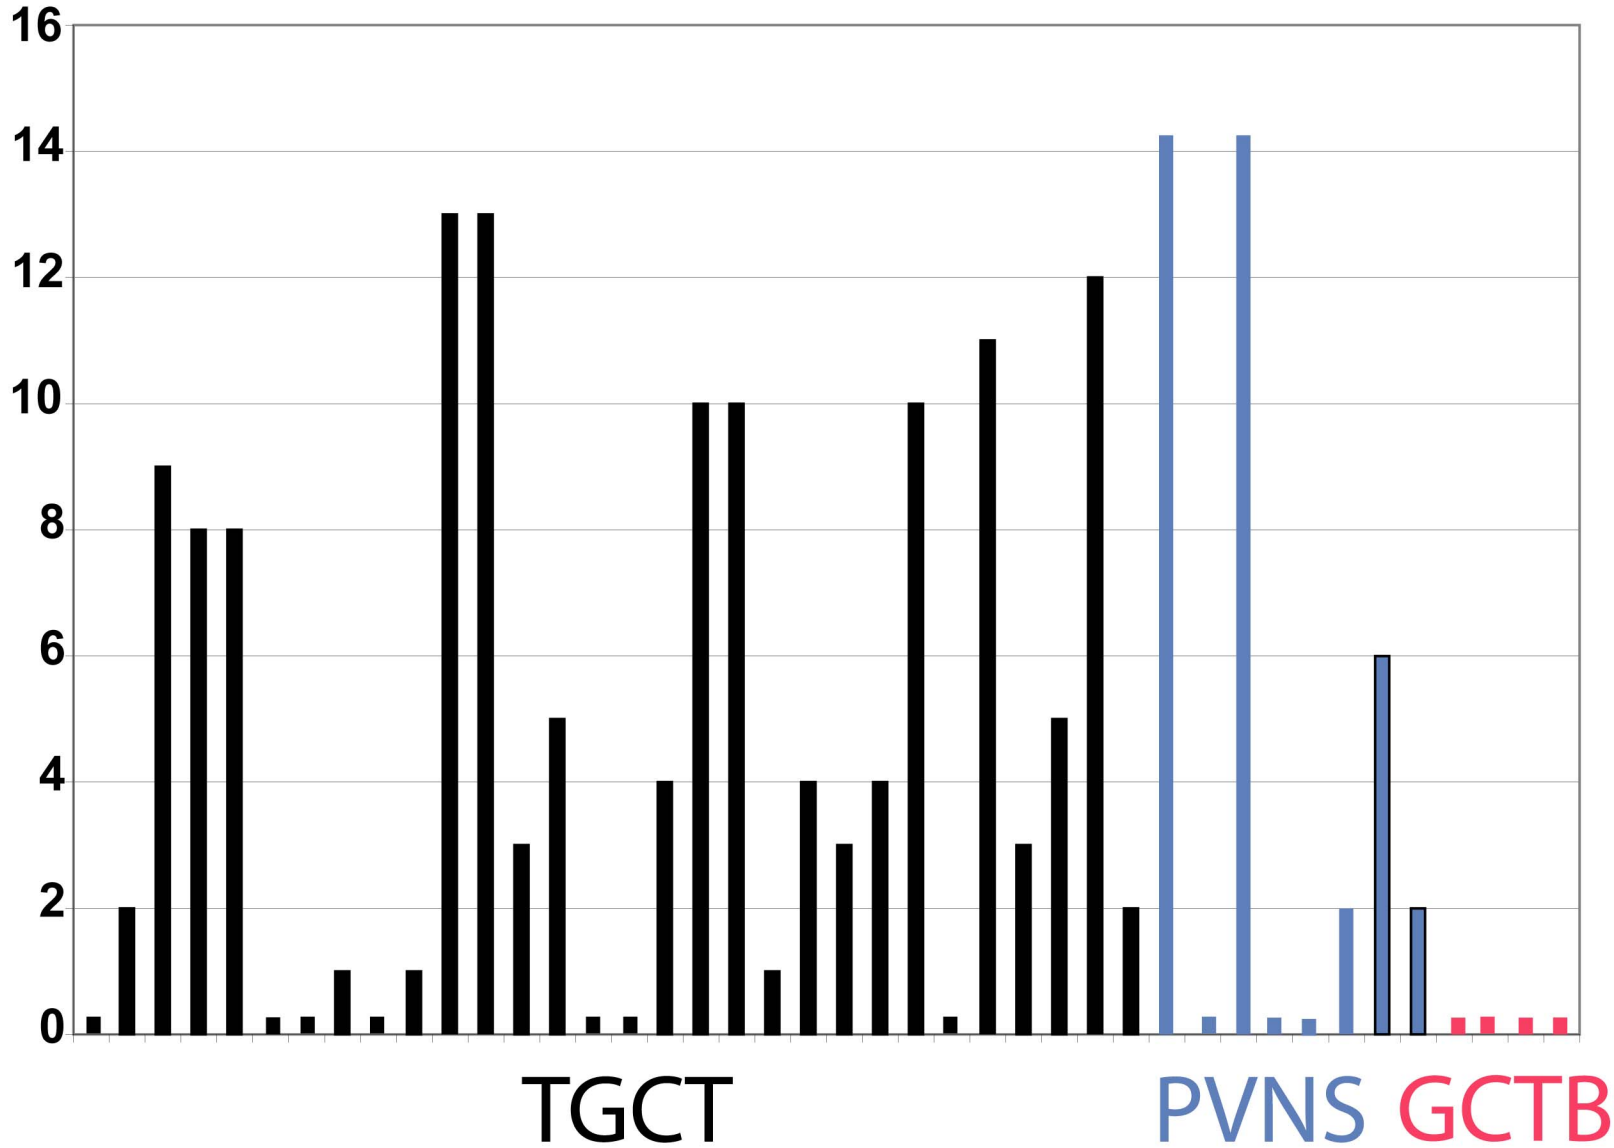

Supplement: pnas_0507321103_4.pdf [file pnas_0507321103_4.pdf]
